# Supplementary material for: Neurotrophic Role of the Next-Generation Probiotic Strain L. lactis MG1363-pMG36e-GLP-1 on Parkinson’s Disease via Inhibiting Ferroptosis
Source: MDPI journal article supplement (doi:10.3390/nu14224886), 2022-11-18
Supplement: s1 [file s1]

**Table S1.** Antibodies used in this study.

| Antibodies                                            | Source/Cat. No.                         | Host   | Dilution                            |
|-------------------------------------------------------|-----------------------------------------|--------|-------------------------------------|
| Tyrosine hydroxylase<br>(TH)                          | Proteintech (25859-1-AP)                | Rabbit | 1 : 5, 000 (WB)<br>1 : 1, 000 (IHC) |
| $\alpha$ -synuclein<br>( $\alpha$ -syn)               | Proteintech (10842-1-AP)                | Rabbit | 1 : 1, 000 (WB)<br>1 : 200 (IF)     |
| Brain-derived neurotrophic factor<br>(BDNF)           | Servicebio (GB11559)                    | Rabbit | 1 : 100 (IF)                        |
| Glial cell line-derived neurotrophic<br>factor (GDNF) | Servicebio (GB11403)                    | Rabbit | 1 : 200 (IF)                        |
| Glutathione peroxidase 4<br>(GPX4)                    | Abcam (ab125066)                        | Rabbit | 1 : 5, 000 (WB)<br>1 : 200 (IF)     |
| Zonula occludens-1<br>(ZO-1)                          | Proteintech (21773-1-AP)                | Rabbit | 1 : 500 (WB)                        |
| Occludin                                              | Proteintech (13409-1-AP)                | Rabbit | 1 : 1, 000 (WB)                     |
| $\beta$ -actin                                        | CST (4970S)                             | Mouse  | 1 : 1, 000 (WB)                     |
| DAT                                                   | Proteintech (22524-1-AP)                | Rabbit | 1 : 1, 000 (WB)                     |
| GLP-1 receptor<br>(GLP-1R)                            | Proteintech (26196-1-AP)                | Rabbit | 1 : 1, 000 (WB)                     |
| Transferrin receptor 1<br>(TfR1)                      | Abcam (ab84036)                         | Rabbit | 1 : 1, 000 (WB)                     |
| Divalent metal transporter 1<br>(DMT1)                | Abcam (ab55735)                         | Mouse  | 1 : 1, 000 (WB)                     |
| Ferroptosis suppressor protein 1<br>(FSP1)            | Millipore (07-2274)                     | Rabbit | 1 : 1, 000 (WB)                     |
| Long-chain acyl-CoA synthetase 4<br>(ACSL4)           | Santa Cruz Biotechnology<br>(sc-365230) | Mouse  | 1 : 1, 000 (WB)                     |
| Kelch-like ECH-associated protein 1<br>(Keap1)        | Proteintech (60027-1-Ig)                | Mouse  | 1 : 2, 000 (WB)                     |
| Nuclear factor-like 2<br>(Nrf2)                       | CST (12721S)                            | Rabbit | 1 : 1, 000 (WB)                     |
